# Supplementary material for: Upstream process optimization and micro- and macrocarrier screening for large-scale production of the oncolytic H-1 protoparvovirus
Source: PubMed Central journal article supplement (PMC8648687; doi:10.1007/s00253-021-11642-y), 2021-11-16
Supplement: 253_2021_11642_MOESM1_ESM.pdf [file 253_2021_11642_MOESM1_ESM.pdf]

**Journal:**

Applied Microbiology and Biotechnology

**Title:**

Upstream process optimization and micro- and macrocarrier screening for large-scale production of the oncolytic H-1 protoparvovirus

**Authors:**

Daniel Wohlfarth, Veronika Frehtman, Marcus Müller, Martin Vogel, Linh Minh Phuc Phan, Adrian Brunecker, Barbara Leuchs

**Affiliation:**

German Cancer Research Center, Tumor Virology, Im Neuenheimer Feld 280, 69120 Heidelberg, Germany

**Corresponding author:**

Barbara Leuchs

German Cancer Research Center

Tumor Virology F010

Im Neuenheimer Feld 280

69120 Heidelberg

Germany

B.Leuchs@dkfz.de; 00496221424300; Fax: 00496221424301

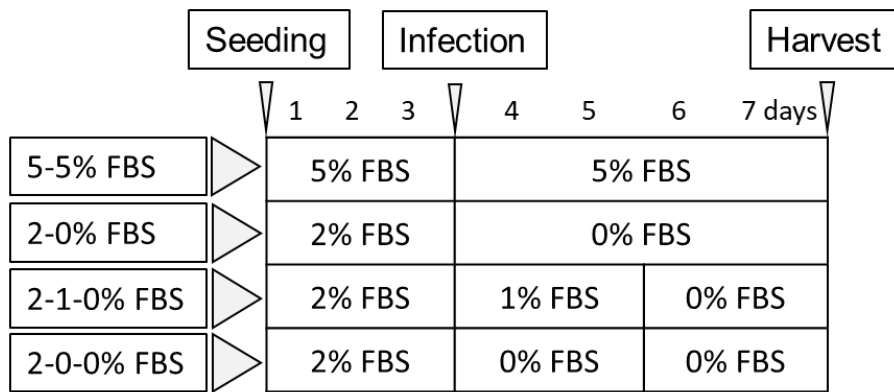

**Fig. S1** Overview of process time lines and FBS content using VP-SFM™ medium utilizing nonsimultaneous seeding and infection.

**Table S1:** Overview of media and supplementations

| Basal medium   | Medium description | FBS [%] | Gln [mM] |
|----------------|--------------------|---------|----------|
| <b>MEM</b>     | Full               | 5       | 2        |
|                | W/o FBS            | 0       | 2        |
|                | Full Gln           | 5       | 5        |
| <b>VP-SFM™</b> | Full               | 5       | 4        |
|                | Full Gln           | 5       | 6        |
|                | Cell expansion     | 2       | 4        |
|                | Infection          | 1       | 4        |
|                | W/o FBS            | 0       | 4        |

All media were supplemented with 100 U/ml penicillin and 100 µg/ml streptomycin

**Table S2:** Summary of tested parameters concerning carrier

| Parameter                                | Parameter range    |
|------------------------------------------|--------------------|
| Seeding RPM                              | 0-100              |
| Process RPM                              | 0-100              |
| Carrier density [cm <sup>2</sup> /ml]    | 5-20               |
| Seeding density [cells/cm <sup>2</sup> ] | 5E3 – 4E4          |
| MOI                                      | 0.01, 0.05         |
| TOI [day]                                | 0, 3, 6, 9, 13, 16 |
| Bead-to-bead transfer                    | (+), (-)           |
| Medium exchange at TOI                   | 50%, 100%          |
| Fed batch                                | (+), (-)           |

**Table S3:** Summary of tested medium volumes with different vessels in carrier experiments

| <b>System</b>           | <b>Scale</b> | <b>Medium volume range [ml]</b> |
|-------------------------|--------------|---------------------------------|
| <b>Plate</b>            | 24-well      | 1                               |
| <b>Erlenmeyer Flask</b> | 125 ml       | 17.5 - 40                       |
|                         | 1 L          | 150 - 300                       |
|                         | 5 L          | 1500                            |
| <b>Spinner flask</b>    | 250 ml       | 100                             |
|                         | 500 ml       | 100                             |
